# Supplementary material
Source: PubMed Central journal article supplement (PMC4959889)
Supplement: NIHMS802251-supplement-S1.pdf [file NIHMS802251-supplement-S1.pdf]

## SUPPLEMENTARY INFORMATION

**Supplemental Table 1 (with references): Past, ongoing, and near future trials in Type 1 diabetes**

| Indication                           | Mechanisms                               | Examples                              | Target                                               | Reference                                        |                  |
|--------------------------------------|------------------------------------------|---------------------------------------|------------------------------------------------------|--------------------------------------------------|------------------|
| Prediabetes                          | Antigen specific immune modulation       | Parental insulin                      | Beta cell protective/Tolerance to insulin            | <sup>1</sup>                                     |                  |
|                                      |                                          | Oral insulin                          | Tolerance to insulin                                 | <sup>2</sup>                                     |                  |
|                                      |                                          | Alum GAD65                            | Tolerance to GAD65                                   | <sup>3</sup>                                     |                  |
|                                      |                                          | Intranasal Insulin                    | Mucosal Antigen Specific Tolerance                   | <sup>4,5</sup>                                   |                  |
|                                      |                                          | Cow's mild avoidance                  | Prevention of cellular activation by molecular mimic | <sup>6</sup>                                     |                  |
|                                      |                                          | Nicotinamide                          | Beta cells                                           | <sup>7</sup>                                     |                  |
|                                      |                                          | Omega-3-fatty acids                   | Beta cell protective                                 | <sup>8</sup>                                     |                  |
| Prediabetes with glucose impairment* | Induction of regulatory mechanisms       | Toleragenic Vitamin D                 | Dendritic cells                                      | <sup>9</sup>                                     |                  |
|                                      |                                          | Teplizumab/ Otelixizumab              | CD3/T cells (non-depleting)                          | <sup>10</sup>                                    |                  |
| New onset diabetes                   | B cell depletion                         | Rituximab                             | CD20/B cells (depleting)                             | <sup>11</sup>                                    |                  |
|                                      | Induction of regulatory cells/mechanisms | Teplizumab/ Otelixizumab              | CD3                                                  | <sup>12,13</sup>                                 |                  |
|                                      |                                          | Cell depletion                        | Thymoglobulin                                        | T lymphocytes                                    | <sup>14,15</sup> |
|                                      |                                          |                                       | Rituximab                                            | CD20                                             | <sup>16</sup>    |
|                                      | Anti-CD5 immunoconjugate                 |                                       | CD5 (B cells)                                        | <sup>17</sup>                                    |                  |
|                                      | Anti-Cytokine                            |                                       | Alefacept                                            | CD2: (depleting for memory T cells and NK cells) | <sup>18</sup>    |
|                                      |                                          |                                       | Ustekinumab                                          | IL-12                                            | <sup>19</sup>    |
|                                      |                                          |                                       | Canakinumab                                          | IL-1                                             | <sup>20</sup>    |
|                                      |                                          |                                       | Anakinra (IL-1RA)                                    | IL-1 receptor                                    | <sup>21</sup>    |
|                                      |                                          |                                       | Daclizumab / (Zenapax)<br>Basiliximab (Simulect)     | IL-2receptor                                     | <sup>22</sup>    |
|                                      |                                          |                                       | "Power mix"                                          | IL-1, IL-15                                      | <sup>23</sup>    |
|                                      | Anti-inflammatory                        |                                       | Etanercept (soluble TNFR2)                           | TNF                                              | <sup>24</sup>    |
|                                      |                                          |                                       | Lisofylline                                          | Beta cells                                       | <sup>25</sup>    |
|                                      |                                          |                                       | Alpha-1 anti-trypsin (Aralast NP)                    |                                                  | <sup>26</sup>    |
|                                      | Costimulation blockade                   |                                       | CTLA4Ig (Abatacept)                                  | B7.1 and B7.2                                    | <sup>27</sup>    |
| Alefacept                            |                                          |                                       | LFA-3/CD2                                            | <sup>28</sup>                                    |                  |
| Gleevec                              |                                          |                                       | Tyrosine Kinase                                      | <sup>29</sup>                                    |                  |
| Broad immune suppression             |                                          | Azathioprine, prednisone              | T and B cell activation and proliferation            | <sup>30</sup>                                    |                  |
|                                      |                                          | Mycophenolate Mofetil with Daclizumab | Lymphocyte proliferation and IL-2rec                 | <sup>31</sup>                                    |                  |

|                                                              |                                          |                                                                               |                                                                   |       |
|--------------------------------------------------------------|------------------------------------------|-------------------------------------------------------------------------------|-------------------------------------------------------------------|-------|
|                                                              |                                          | Cyclosporine<br>Tacrolimus                                                    | Calcineurin                                                       | 32,33 |
|                                                              |                                          | Interleukin-2 (IL-2) with<br>Rapamycin                                        | Downregulate T<br>effector while sparing<br>T regulatory function | 34    |
|                                                              | Antigen specific<br>immune<br>modulation | GAD65alum                                                                     | Tolerance to GAD65                                                | 3     |
|                                                              |                                          | HSP60 (DiaPep277)                                                             | Immune modulatory                                                 | 35    |
|                                                              |                                          | Proinsulin DNA                                                                | Antigen-specific<br>tolerance vaccination                         | 36    |
|                                                              | Cellular therapy                         | Granulocyte-Colony<br>Stimulating Factor                                      | Enhance T regulatory<br>cell numbers                              | 37    |
|                                                              |                                          | Adult human mesenchymal<br>stem cells                                         | Impart immune<br>regulation                                       | 38    |
|                                                              |                                          | Insulin-treated EDCI fixed<br>cells                                           | Tolerance induction                                               | 39    |
|                                                              |                                          | CD34+ cells                                                                   | Stem cell immune<br>modulation                                    | 37    |
|                                                              |                                          | Expanded T regulatory cells                                                   | Augment regulatory T<br>cell numbers                              | 40    |
|                                                              |                                          | Autologous dendritic cell<br>therapy (with and without<br>beta cell peptides) | Tolerogenic vaccine                                               | 41    |
|                                                              |                                          | Umbilical cord blood<br>infusion                                              | Enhance T regulatory<br>cell numbers                              | 42    |
| Diabetes<br>recurrence<br>following islet<br>transplantation | Broad immune<br>suppression              | Tacrolimus, Rapamycin,<br>Daclizumab                                          | "Edmonton Protocol":<br>Calcineurin, mTOR,<br>IL-2rec             | 43,44 |
|                                                              |                                          | Campath-1H                                                                    | CD52: T-cell depleting<br>mAb                                     | 45    |
|                                                              |                                          | Alefacept                                                                     | CD2                                                               | 28    |
|                                                              |                                          | Teplizumab                                                                    | CD3                                                               | 46,47 |
|                                                              | Anti-inflammatory                        | Lisofylline                                                                   |                                                                   | 48    |
|                                                              | Antigen<br>processing                    | Deoxyspergualin                                                               | Monocytes                                                         | 49    |

**\* Relatives of patients with T1D who are positive for multiple autoantibodies or who have indeterminant glucose tolerance have a > 70% risk of diabetes over a 7 year observation period<sup>50</sup>. They are considered similar to patients with T1D without manifest hyperglycemia.**

#### References

1. Effects of insulin in relatives of patients with type 1 diabetes mellitus. *N Engl J Med* **346**, 1685-91. (2002).
2. Skyler, J.S. et al. Effects of oral insulin in relatives of patients with type 1 diabetes: The Diabetes Prevention Trial--Type 1. *Diabetes Care* **28**, 1068-76 (2005).
3. Ludvigsson, J. et al. GAD treatment and insulin secretion in recent-onset type 1 diabetes. *N Engl J Med* **359**, 1909-20 (2008).

4. Harrison, L.C. et al. Pancreatic beta-cell function and immune responses to insulin after administration of intranasal insulin to humans at risk for type 1 diabetes. *Diabetes Care* **27**, 2348-55 (2004).
5. Achenbach, P., Barker, J. & Bonifacio, E. Modulating the natural history of type 1 diabetes in children at high genetic risk by mucosal insulin immunization. *Curr Diab Rep* **8**, 87-93 (2008).
6. Akerblom, H.K. et al. Dietary manipulation of beta cell autoimmunity in infants at increased risk of type 1 diabetes: a pilot study. *Diabetologia* **48**, 829-37 (2005).
7. Gale, E.A., Bingley, P.J., Emmett, C.L. & Collier, T. European Nicotinamide Diabetes Intervention Trial (ENDIT): a randomised controlled trial of intervention before the onset of type 1 diabetes. *Lancet* **363**, 925-31 (2004).
8. Norris, J.M. et al. Omega-3 polyunsaturated fatty acid intake and islet autoimmunity in children at increased risk for type 1 diabetes. *Jama* **298**, 1420-8 (2007).
9. Gysemans, C.A. et al. 1,25-Dihydroxyvitamin D3 modulates expression of chemokines and cytokines in pancreatic islets: implications for prevention of diabetes in nonobese diabetic mice. *Endocrinology* **146**, 1956-64 (2005).
10. Fife, B.T. et al. Insulin-induced remission in new-onset NOD mice is maintained by the PD-1-PD-L1 pathway. *J Exp Med* **203**, 2737-47 (2006).
11. Hu, C.Y. et al. Treatment with CD20-specific antibody prevents and reverses autoimmune diabetes in mice. *J Clin Invest* **117**, 3857-3867 (2007).
12. Herold, K.C. et al. Anti-CD3 monoclonal antibody in new-onset type 1 diabetes mellitus. *N Engl J Med* **346**, 1692-8. (2002).
13. Keymeulen, B. et al. Insulin needs after CD3-antibody therapy in new-onset type 1 diabetes. *N Engl J Med* **352**, 2598-608 (2005).
14. Eisenbarth, G.S. et al. Anti-thymocyte globulin and prednisone immunotherapy of recent onset type 1 diabetes mellitus. *Diabetes Res* **2**, 271-6 (1985).
15. Saudek, F. et al. Polyclonal anti-T-cell therapy for type 1 diabetes mellitus of recent onset. *Rev Diabet Stud* **1**, 80-8 (2004).
16. Pescovitz, M.D. et al. Rituximab, B-lymphocyte depletion, and preservation of beta-cell function. *N Engl J Med* **361**, 2143-52 (2009).
17. Skyler, J.S. et al. Effects of an anti-CD5 immunoconjugate (CD5-plus) in recent onset type I diabetes mellitus: a preliminary investigation. The CD5 Diabetes Project Team. *J Diabetes Complications* **7**, 224-32 (1993).
18. Barlow, A.K. & Like, A.A. Anti-CD2 monoclonal antibodies prevent spontaneous and adoptive transfer of diabetes in the BB/Wor rat. *Am J Pathol* **141**, 1043-51 (1992).
19. Trembleau, S., Penna, G., Gregori, S., Giarratana, N. & Adorini, L. IL-12 administration accelerates autoimmune diabetes in both wild-type and IFN-gamma-deficient nonobese diabetic mice, revealing pathogenic and protective effects of IL-12-induced IFN-gamma. *J Immunol* **170**, 5491-501 (2003).
20. Bendtzen, K. et al. Cytotoxicity of human p17 interleukin-1 for pancreatic islets of Langerhans. *Science* **232**, 1545-7 (1986).
21. Thomas, H.E. et al. IL-1 Receptor Deficiency Slows Progression to Diabetes in the NOD Mouse. *Diabetes* **53**, 113-121 (2004).
22. Zheng, X.X. et al. IL-2 receptor-targeted cytolytic IL-2/Fc fusion protein treatment blocks diabetogenic autoimmunity in nonobese diabetic mice. *J Immunol* **163**, 4041-8 (1999).
23. Koulmanda, M. et al. Modification of adverse inflammation is required to cure new-onset type 1 diabetic hosts. *Proc Natl Acad Sci U S A* **104**, 13074-9 (2007).

24. Mastrandrea, L. et al. Etanercept treatment in children with new-onset type 1 diabetes: pilot randomized, placebo-controlled, double-blind study. *Diabetes Care* **32**, 1244-9 (2009).
25. Chen, M., Yang, Z., Wu, R. & Nadler, J.L. Lisofylline, a novel antiinflammatory agent, protects pancreatic beta-cells from proinflammatory cytokine damage by promoting mitochondrial metabolism. *Endocrinology* **143**, 2341-8 (2002).
26. Koulmanda, M. et al. Curative and beta cell regenerative effects of alpha1-antitrypsin treatment in autoimmune diabetic NOD mice. *Proc Natl Acad Sci U S A* **105**, 16242-7 (2008).
27. Lenschow, D.J. et al. Differential effects of anti-B7-1 and anti-B7-2 monoclonal antibody treatment on the development of diabetes in the nonobese diabetic mouse. *J Exp Med* **181**, 1145-55. (1995).
28. Weaver, T.A. et al. Alefacept promotes co-stimulation blockade based allograft survival in nonhuman primates. *Nat Med* **15**, 746-9 (2009).
29. Louvet, C. et al. Tyrosine kinase inhibitors reverse type 1 diabetes in nonobese diabetic mice. *Proc Natl Acad Sci U S A* **105**, 18895-900 (2008).
30. Cook, J.J. et al. Double-blind controlled trial of azathioprine in children with newly diagnosed type I diabetes. *Diabetes* **38**, 779-83 (1989).
31. Hao, L., Wang, Y., Chan, S.M. & Lafferty, K.J. Effect of mycophenolate mofetil on islet allografting to chemically induced or spontaneously diabetic animals. *Transplant Proc* **24**, 2843-4 (1992).
32. Bougneres, P.F. et al. Factors associated with early remission of type I diabetes in children treated with cyclosporine. *N Engl J Med* **318**, 663-70. (1988).
33. Stiller, C.R. et al. Effects of cyclosporine immunosuppression in insulin-dependent diabetes mellitus of recent onset. *Science* **223**, 1362-7 (1984).
34. Rabinovitch, A., Suarez-Pinzon, W.L., Shapiro, A.M., Rajotte, R.V. & Power, R. Combination therapy with sirolimus and interleukin-2 prevents spontaneous and recurrent autoimmune diabetes in NOD mice. *Diabetes* **51**, 638-45 (2002).
35. Raz, I. et al. Beta-cell function in new-onset type 1 diabetes and immunomodulation with a heat-shock protein peptide (DiaPep277): a randomised, double-blind, phase II trial. *Lancet* **358**, 1749-53 (2001).
36. Urbanek-Ruiz, I. et al. Immunization with DNA encoding an immunodominant peptide of insulin prevents diabetes in NOD mice. *Clin Immunol* **100**, 164-71 (2001).
37. Voltarelli, J.C. et al. Autologous nonmyeloablative hematopoietic stem cell transplantation in newly diagnosed type 1 diabetes mellitus. *Jama* **297**, 1568-76 (2007).
38. Abdi, R., Fiorina, P., Adra, C.N., Atkinson, M. & Sayegh, M.H. Immunomodulation by mesenchymal stem cells: a potential therapeutic strategy for type 1 diabetes. *Diabetes* **57**, 1759-67 (2008).
39. Luo, X. et al. ECDI-fixed allogeneic splenocytes induce donor-specific tolerance for long-term survival of islet transplants via two distinct mechanisms. *Proc Natl Acad Sci U S A* **105**, 14527-32 (2008).
40. Tang, Q. et al. In vitro-expanded antigen-specific regulatory T cells suppress autoimmune diabetes. *J Exp Med* **199**, 1455-65 (2004).
41. Machen, J. et al. Antisense oligonucleotides down-regulating costimulation confer diabetes-preventive properties to nonobese diabetic mouse dendritic cells. *J Immunol* **173**, 4331-41 (2004).
42. Haller, M.J. et al. Autologous umbilical cord blood transfusion in very young children with type 1 diabetes. *Diabetes Care* **32**, 2041-6 (2009).

43. Shapiro, A.M. et al. Islet transplantation in seven patients with type 1 diabetes mellitus using a glucocorticoid-free immunosuppressive regimen. *N Engl J Med* **343**, 230-8. (2000).
44. Shapiro, A.M. et al. International trial of the Edmonton protocol for islet transplantation. *N Engl J Med* **355**, 1318-30 (2006).
45. Froud, T. et al. Islet transplantation with alemtuzumab induction and calcineurin-free maintenance immunosuppression results in improved short- and long-term outcomes. *Transplantation* **86**, 1695-701 (2008).
46. Hering, B.J. et al. Transplantation of cultured islets from two-layer preserved pancreases in type 1 diabetes with anti-CD3 antibody. *Am J Transplant* **4**, 390-401 (2004).
47. Hering, B.J. et al. Insulin independence after single-donor islet transplantation in type 1 diabetes with hOKT3g-1(ala-ala), sirolimus, tacrolimus therapy. *American Journal of Transplantation*, 180A (2001).
48. Yang, Z. et al. The novel anti-inflammatory agent lisofylline prevents autoimmune diabetic recurrence after islet transplantation. *Transplantation* **77**, 55-60 (2004).
49. Gores, P.F. et al. Insulin independence in type I diabetes after transplantation of unpurified islets from single donor with 15-deoxyspergualin. *Lancet* **341**, 19-21 (1993).
50. Sherr, J., Sosenko, J., Skyler, J.S. & Herold, K.C. Prevention of type 1 diabetes: the time has come. *Nat Clin Pract Endocrinol Metab* **4**, 334-43 (2008).

### Supplemental Table 2. Ongoing trials for Type 1 diabetes

| Study Title                                                                            | Agent                       | Phase | Patient population               | Clinicaltrials.gov |
|----------------------------------------------------------------------------------------|-----------------------------|-------|----------------------------------|--------------------|
| <b>Biologics</b>                                                                       |                             |       |                                  |                    |
| AbATE                                                                                  | Teplizumab (anti-CD3 mAb)   | 2     | New onset T1DM                   | NCT00129259        |
| DEFEND-1                                                                               | Otelixizumab (anti-CD3 mAb) | 3     | New onset T1DM                   | NCT00678886        |
| Protégé                                                                                | Teplizumab                  | 3     | New onset T1DM                   | NCT00385697        |
| Protégé Encore                                                                         | Teplizumab                  | 3     | New onset T1DM                   | NCT00920582        |
| Anti-CD3 Prevention Trial                                                              | Teplizumab                  | 2     | Prevention for at risk relatives | NCT01030861        |
| START                                                                                  | Thymoglobulin               | 2     | New onset T1DM                   | NCT00515099        |
| Effects of Recombinant Human Glutamic Acid Decarboxylase                               | GAD65-alum                  | 2     | New onset T1DM                   | NCT00529399        |
| A Phase III Study to Investigate the Impact of Diamyd in Patients Newly Diagnosed With | GAD65-alum                  | 3     | New onset T1DM                   | NCT00723411        |

|                                                                                                                                             |                                                                |   |                                        |             |
|---------------------------------------------------------------------------------------------------------------------------------------------|----------------------------------------------------------------|---|----------------------------------------|-------------|
| Type 1 Diabetes (EU)                                                                                                                        |                                                                |   |                                        |             |
| Novel Therapy<br>Combining Regenerative<br>Stimuli<br>Immunomodulation to<br>Preserve Beta Cell<br>Function in New Onset<br>Type 1 Diabetes | Lansoprazole<br>Sitagliptin<br>GAD65                           | 2 | New onset<br>T1DM                      | NCT00837759 |
| Subcutaneous<br>Administration of<br>Otelixizumab to T1DM<br>Patients                                                                       | Otelixizumab                                                   | 1 | T1DM                                   | NCT00946257 |
| Delay                                                                                                                                       | Teplizumab                                                     | 2 | Recent<br>onset T1DM<br>(4-12 mos)     | NCT00378508 |
| Anti-Interleukin-1 in<br>Diabetes Action (AIDA)                                                                                             | IL-1 receptor<br>antagonist<br>(Anakinra)                      | 3 | New onset<br>T1DM                      | NCT00711503 |
| <b>Cells</b>                                                                                                                                |                                                                |   |                                        |             |
| Cord Blood Infusion for<br>Type 1 Diabetes Mellitus<br>(T1DM)                                                                               | Cord blood                                                     | 1 | T1DM                                   | NCT00989547 |
| Autologous Dendritic<br>Cell Therapy for Type 1<br>Diabetes Suppression: A<br>Safety Study                                                  | Dendritic cells                                                | 1 | T1DM                                   | NCT00445913 |
| Cord Blood Plus Vitamin<br>D and Omega 3s in T1D                                                                                            | Umbilical cord<br>blood<br>Vitamin D<br>Omega 3 fatty<br>acids | 2 | T1DM                                   | NCT00873925 |
| Umbilical Cord Blood<br>Infusion to Treat Type 1<br>Diabetes                                                                                | Umbilical cord<br>blood                                        | 1 |                                        | NCT00305344 |
| <b>Small molecules</b>                                                                                                                      |                                                                |   |                                        |             |
| Intranasal Insulin for<br>Prevention of Type 1<br>Diabetes                                                                                  | Intranasal<br>insulin                                          | 2 | Prevention<br>for at risk<br>relatives | NCT00223613 |
| Oral Insulin for<br>Prevention of Diabetes<br>in Relatives at Risk for<br>Type 1 Diabetes Mellitus                                          | Oral insulin                                                   | 3 | Prevention<br>for at risk              | NCT00419562 |
| Trial of Intranasal Insulin<br>in Children and Young<br>Adults at Risk of Type 1<br>Diabetes                                                | Intranasal<br>insulin                                          | 2 | Prevention<br>for at risk              | NCT00336674 |
| Tolerability, Safety, and                                                                                                                   | INGAP                                                          | 1 | T1DM                                   | NCT00995540 |

|                                                                                    |                           |   |                |             |
|------------------------------------------------------------------------------------|---------------------------|---|----------------|-------------|
| Efficacy Study of INGAP Peptide to Treat Type 1 Diabetes Mellitus in Adults        | peptide                   |   |                |             |
| <b>Other</b>                                                                       |                           |   |                |             |
| Effect of Metabolic Control at Onset of Diabetes on Progression of Type 1 Diabetes | Intensive glucose control | 3 | New onset T1DM | NCT00505206 |
| Phase 1 Study of BHT-3021 in Subjects With Type 1 Diabetes Mellitus                | Proinsulin DNA vaccine    | 1 | T1DM           | NCT00453375 |
